# Supplementary material for: Epigenetic regulation of the respiratory chain by a mitochondrial distress-related redox signal
Source: Frontiers journal article supplement (doi:10.3389/fcell.2025.1608400), 2025-08-05

Supplementary Figure 1

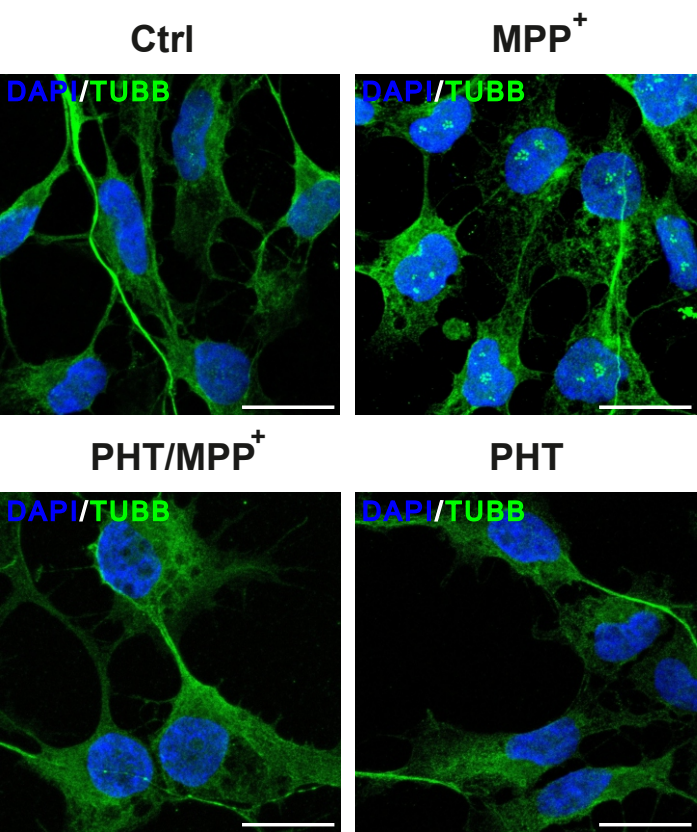

Supplement: Data_Sheet_1.pdf [file Data_Sheet_1.pdf]
